# Supplementary material
Source: PubMed Central journal article supplement (PMC4875176)
Supplement: 13238_2011_1057_MOESM1_ESM.pdf [file 13238_2011_1057_MOESM1_ESM.pdf]

## SUPPLEMENTAL MATERIALS

**Supplementary Table 1**  
**Mutagenic primers used for the site-directed saturation mutagenesis**

| Primers | Sequences (5' to 3')                               |
|---------|----------------------------------------------------|
| W474X_f | GCCAGTGTAGTGGACNNK <b>K</b> GAGGAGATGTACGAG        |
| W474X_r | CTCGTACATCTCCTCMNNGTCCACTACACTGGC                  |
| M477X_f | CTGGGAGGAGNNK <b>T</b> ACGAGCTCAGCG                |
| M477X_r | GCTGAGCTCGTAMNNCTCCTCCCAGTCC                       |
| F485X_f | GACGCCGCCNNK <b>K</b> CGGAACTTCATAGAGC             |
| F485X_r | TGAAGTTCCGMNNGGCGGGCTCGCTGAG                       |
| F488X_f | GCCTTCCGGAACNNK <b>K</b> ATAGAGCAGCTGACG           |
| F488X_r | CGTCAGCTGCTCTATMNNGTTCGGAAGGC                      |
| I489X_f | CGCCTTCCGGAACTTCNNK <b>K</b> GAGCAGCTGACGGGAG      |
| I489X_r | CTCCCGTCAGCTGCTCMNNGAAGTTCCGGAAGGCG                |
| T527X_f | ACGACAGCGTTNNK <b>K</b> CCGCTGAAACCCCTACTG         |
| T527X_r | AGGGGTTTCAGCGGMNNAACGCTGTCGTTCTG                   |
| P370X_f | GTACACGGCGGGNNK <b>K</b> TTCGCGGAGGACAG            |
| P370X_r | GTCCTCCGCGAAMNNCCCCGCCGTGTACC                      |
| E419X_f | ACCCCTGCGGCGGTNNK <b>K</b> CTCGAGGATGTATC          |
| E419X_r | ATACATCCTCGAGMNNACCGCCGCACCCCTCGC                  |
| Y444X_f | ACATCATGGGCNNK <b>K</b> AGCTACGGCGGCTACATG         |
| Y444X_r | TAGCCGCCGTAGCTMNNGCCCATGATGTAAAG                   |
| Y446X_f | CATGGGCTACAGCNNK <b>K</b> GGCGGCTACATGACCC         |
| Y446X_r | TCATGTAGCCGCCMNNGCTGTAGCGCATGATG                   |
| Y449X_f | CAGCTACGGCGGCNNK <b>K</b> ATGACCCTATGCGCCCTAACAATG |
| Y449X_r | CATAGGGTCATMNNGCCCGCGTAGCTGTAGCCCATGATG            |

N represents any nucleotides of A, T, G, or C, while K represents G or T and M represents G or T.
